# Supplementary material
Source: MDPI journal article supplement (https://www.mdpi.com/2072-4292/8/12/1000)
Supplement: s1 [file s1]

# Supplementary Materials: Tropical Peatland Burn Depth and Combustion Heterogeneity Assessed Using UAV Photogrammetry and Airborne LiDAR

Jake E. Simpson, Martin J. Wooster, Thomas E. L. Smith, Mandar Trivedi,  
Ronald R. E. Vernimmen, Rahman Dedi, Mulya Shakti and Yoan Dinata

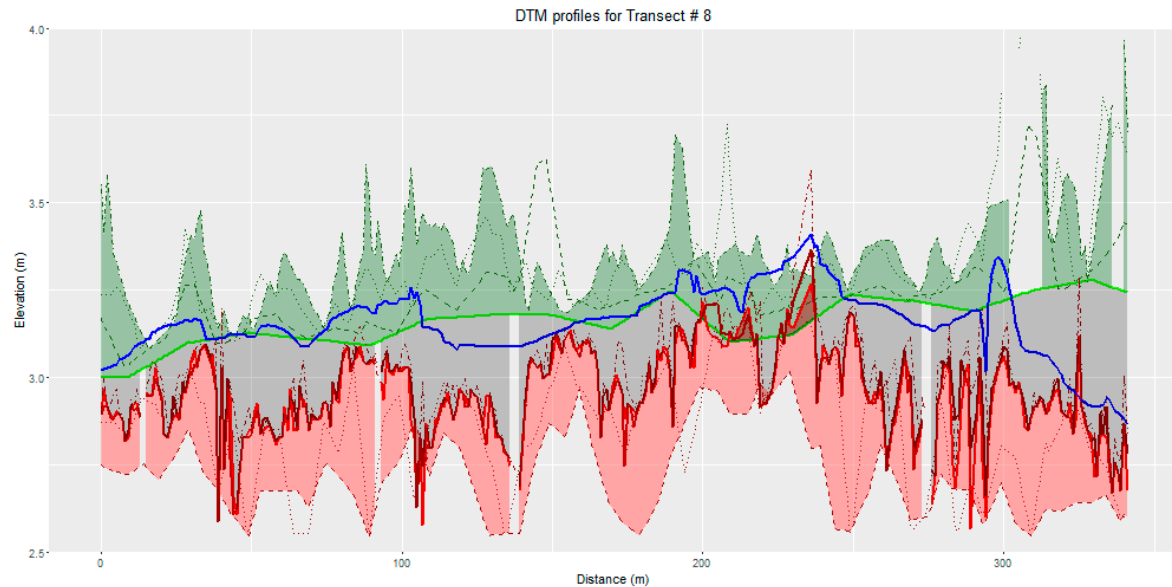

(a)

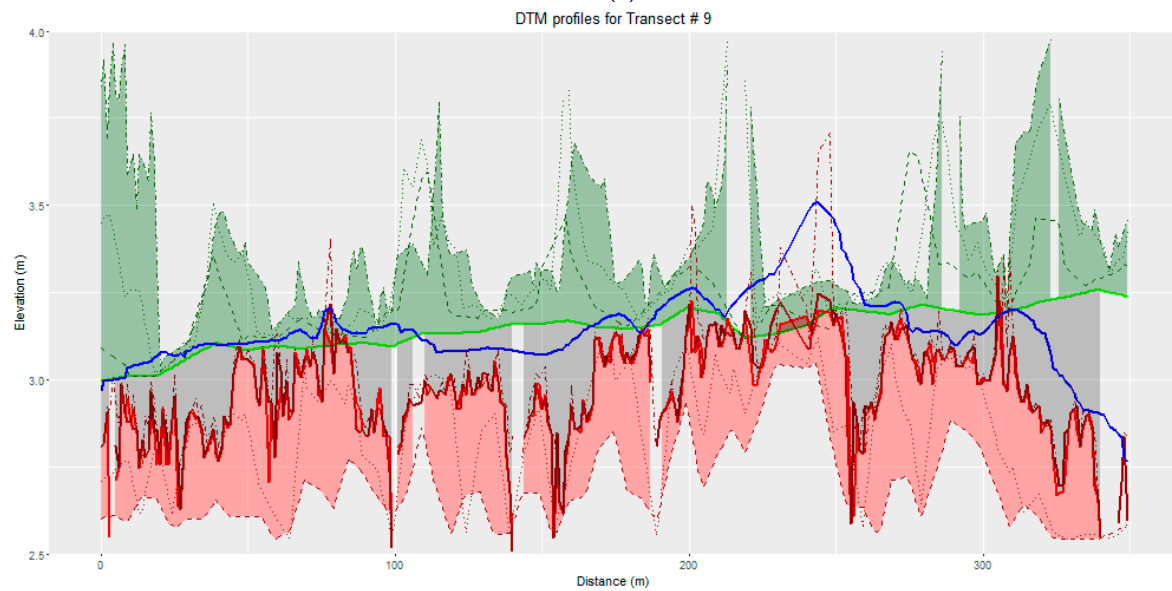

(b)

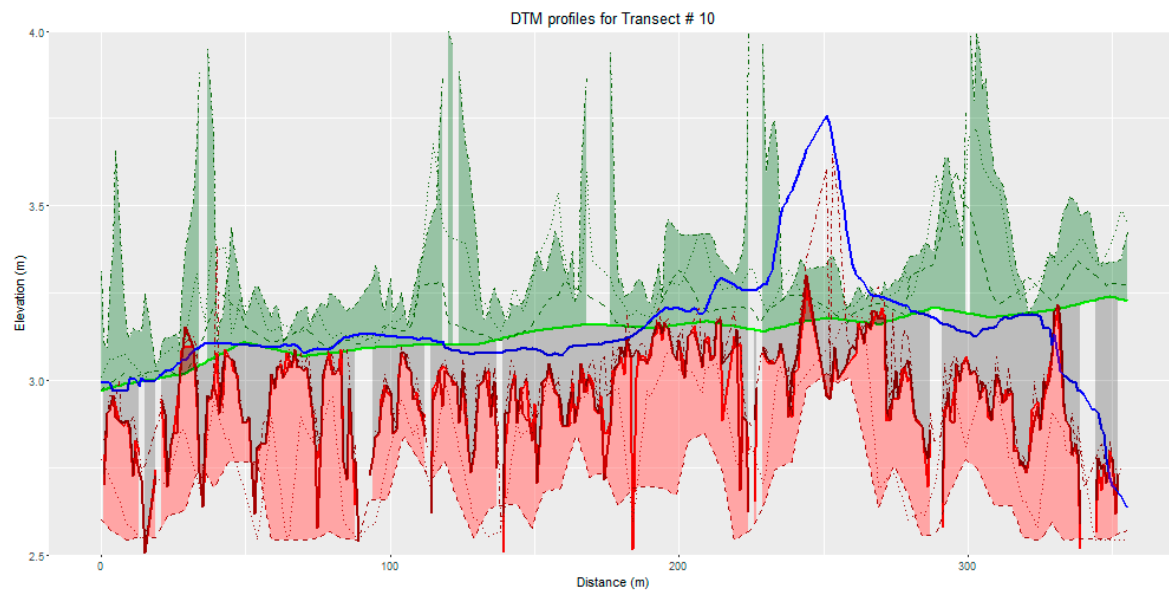

(c)

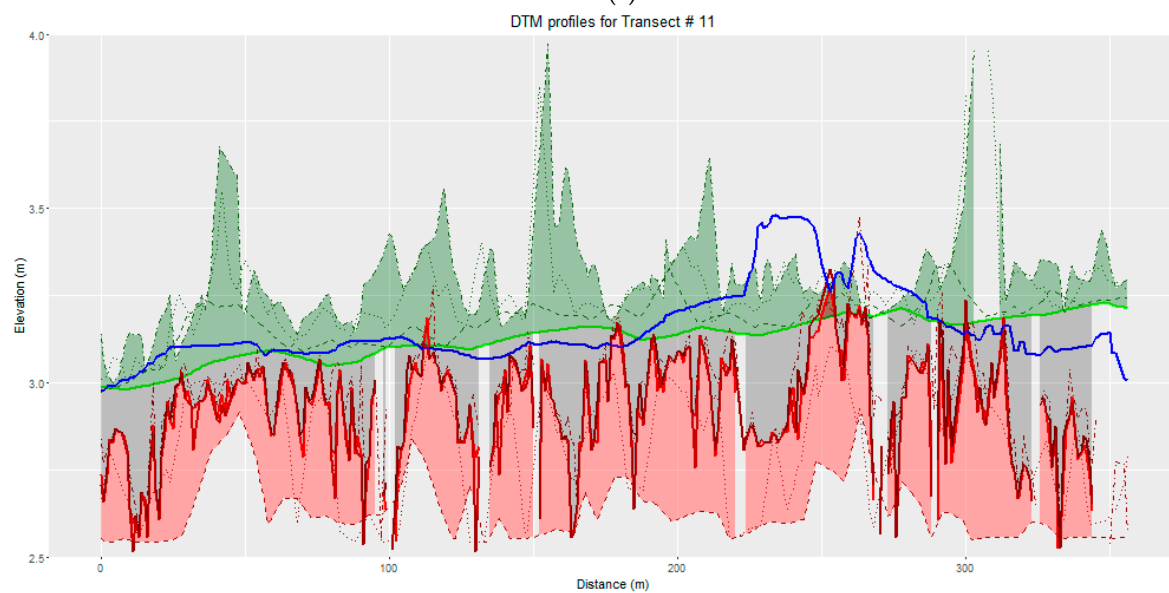

(d)

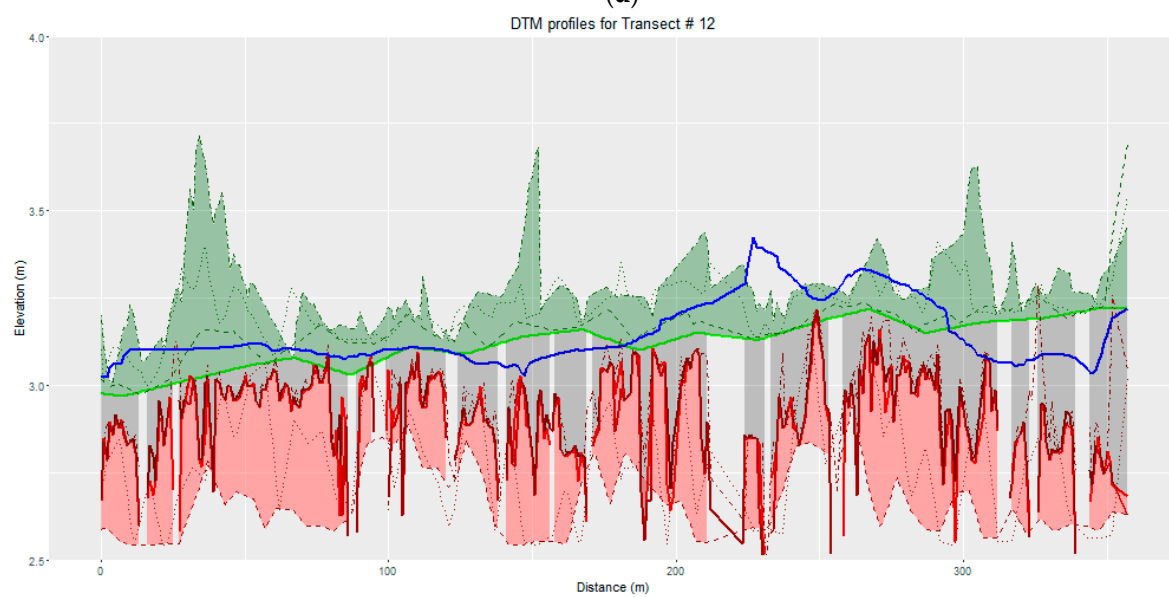

(e)

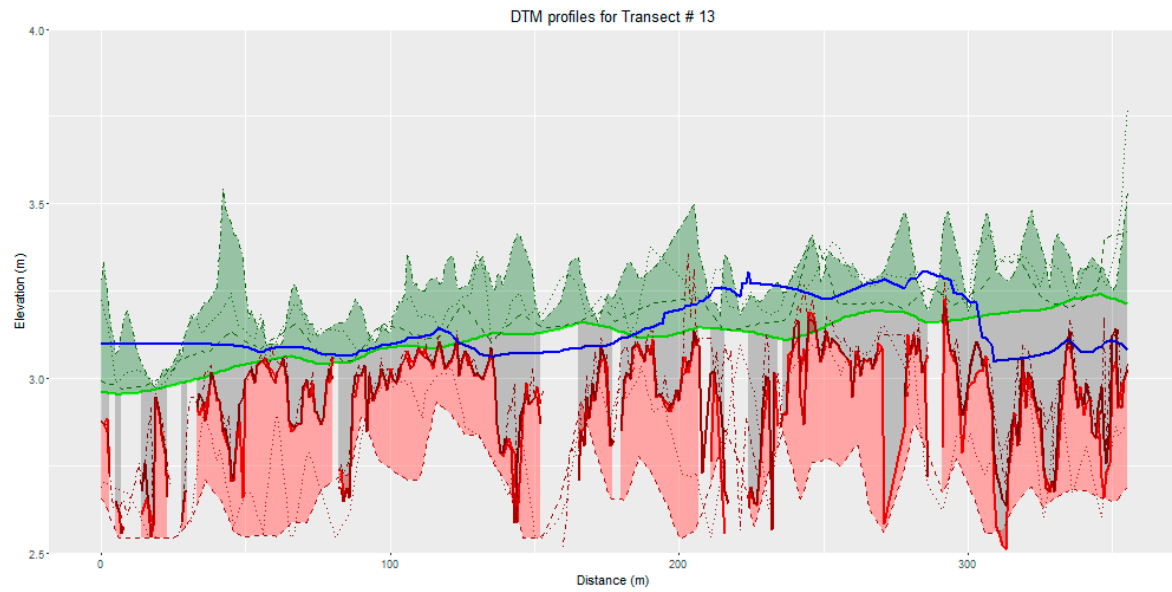

(f)

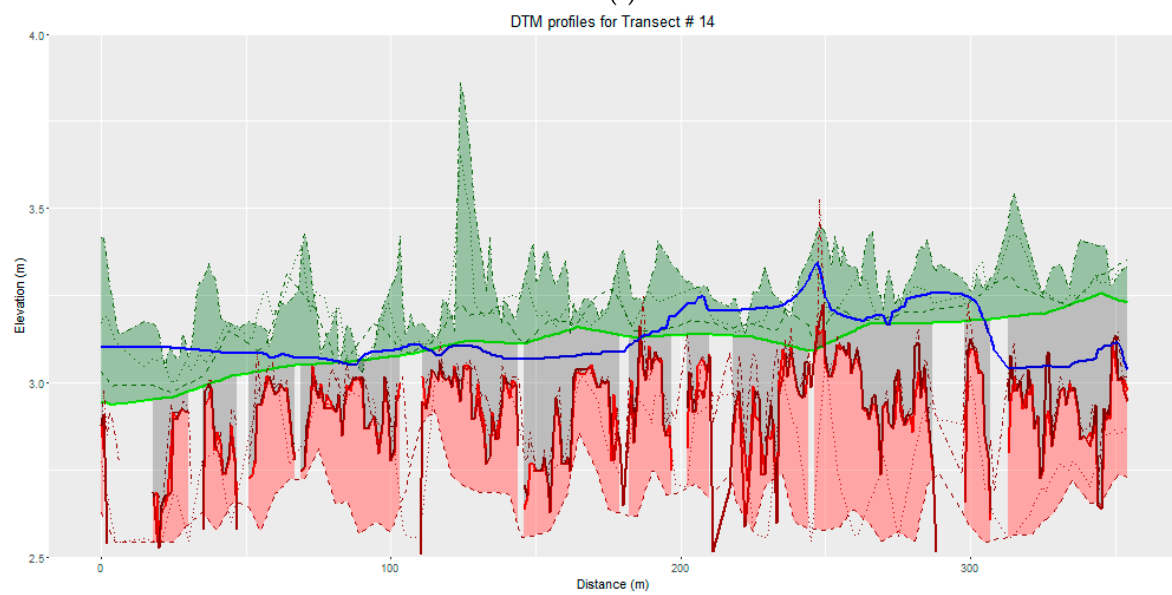

(g)

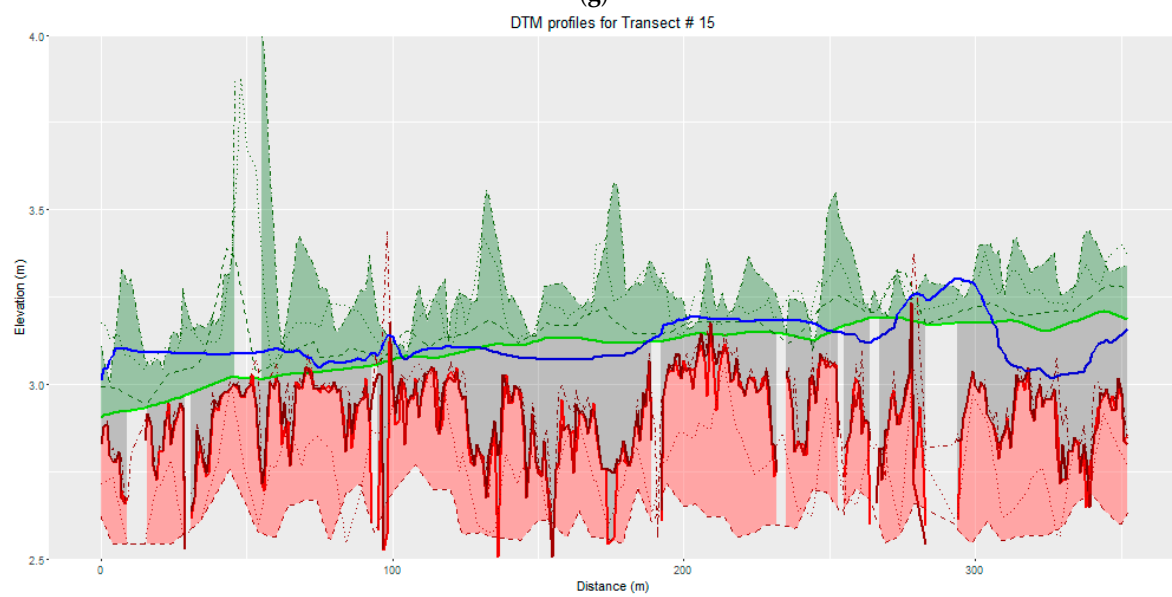

(h)

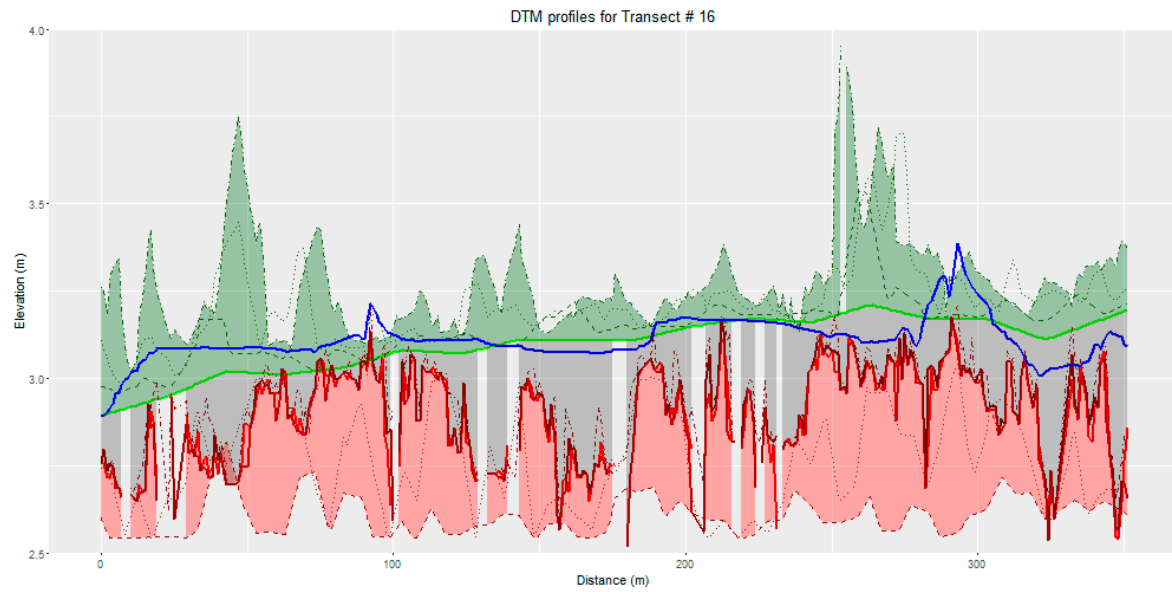

(i)

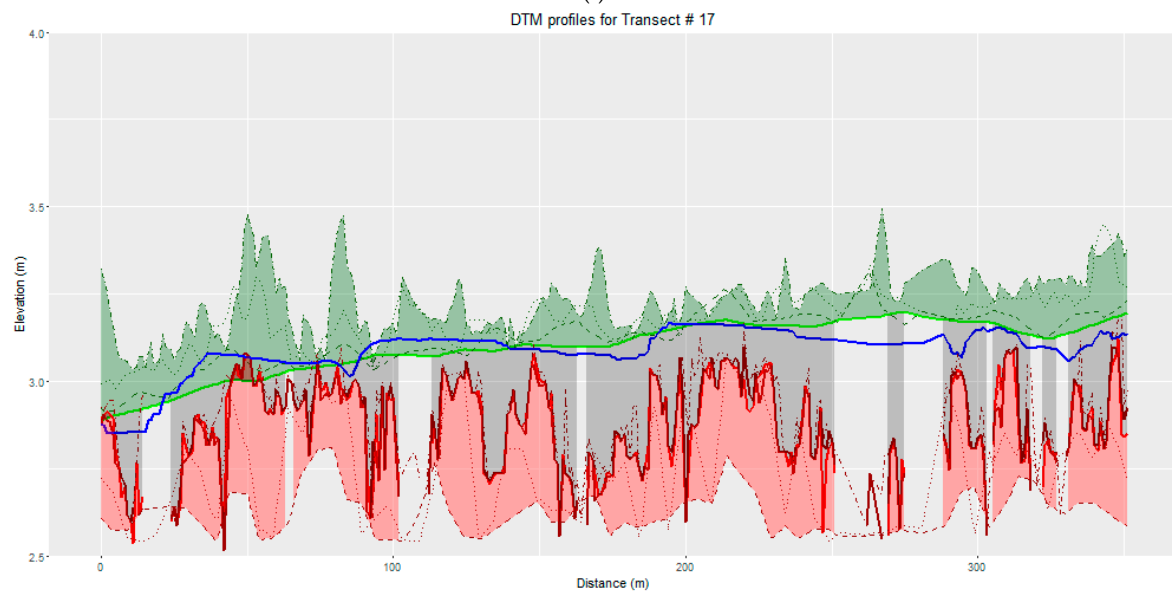

(j)

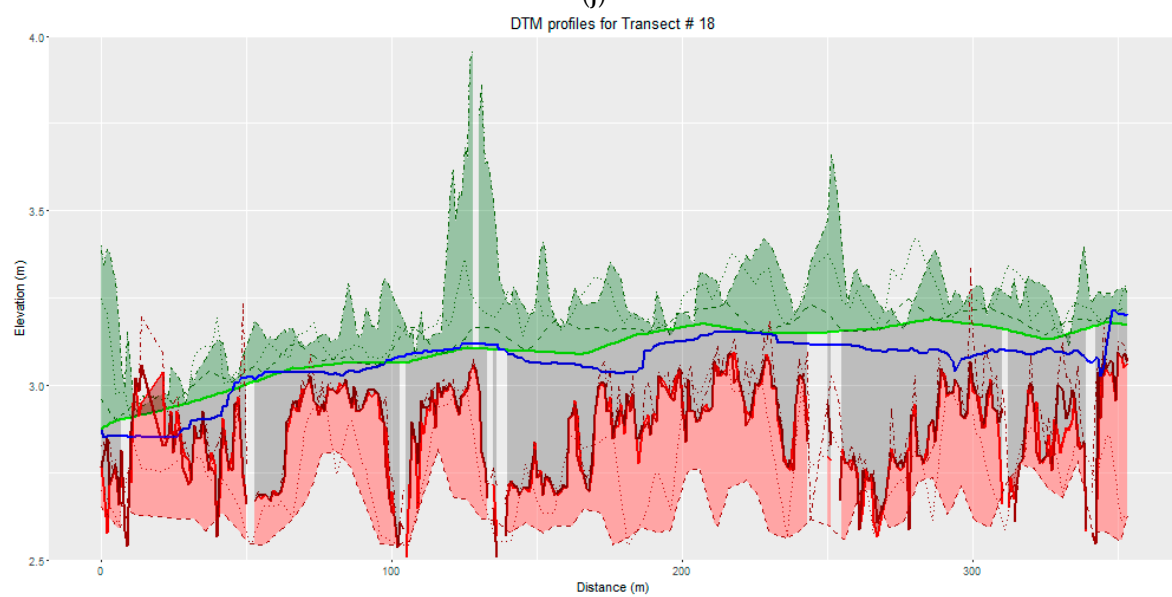

(k)

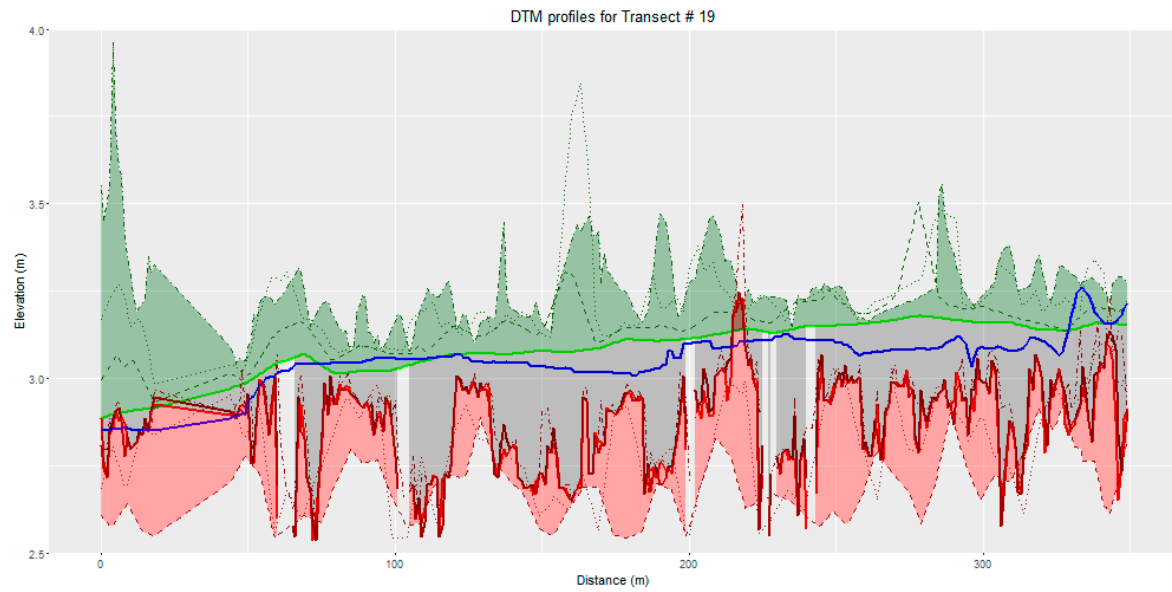

(l)

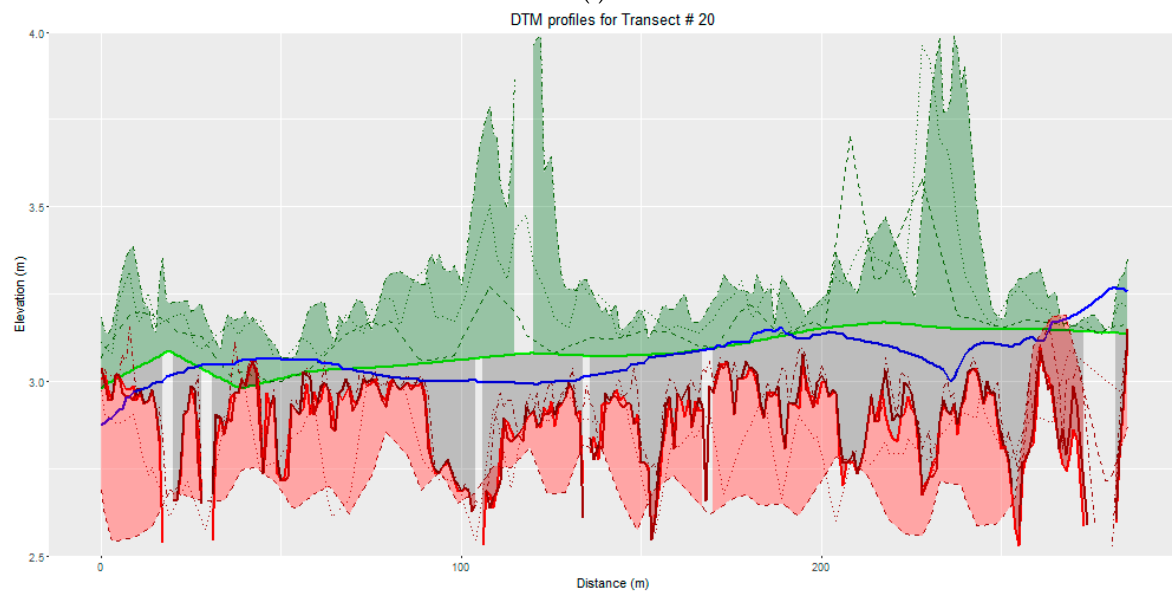

(m)

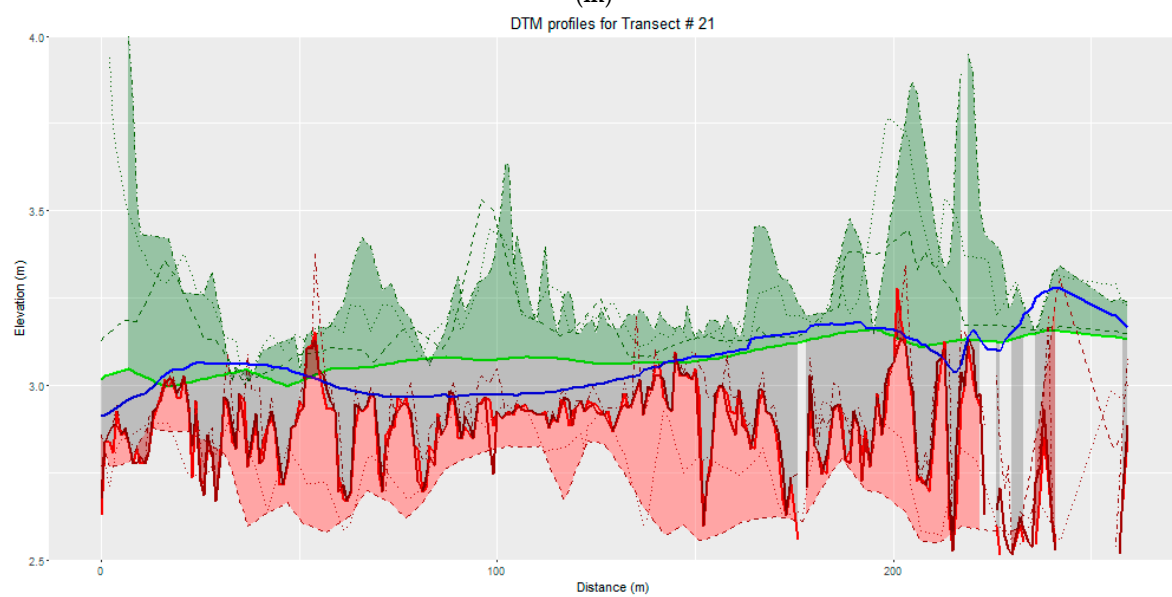

(n)

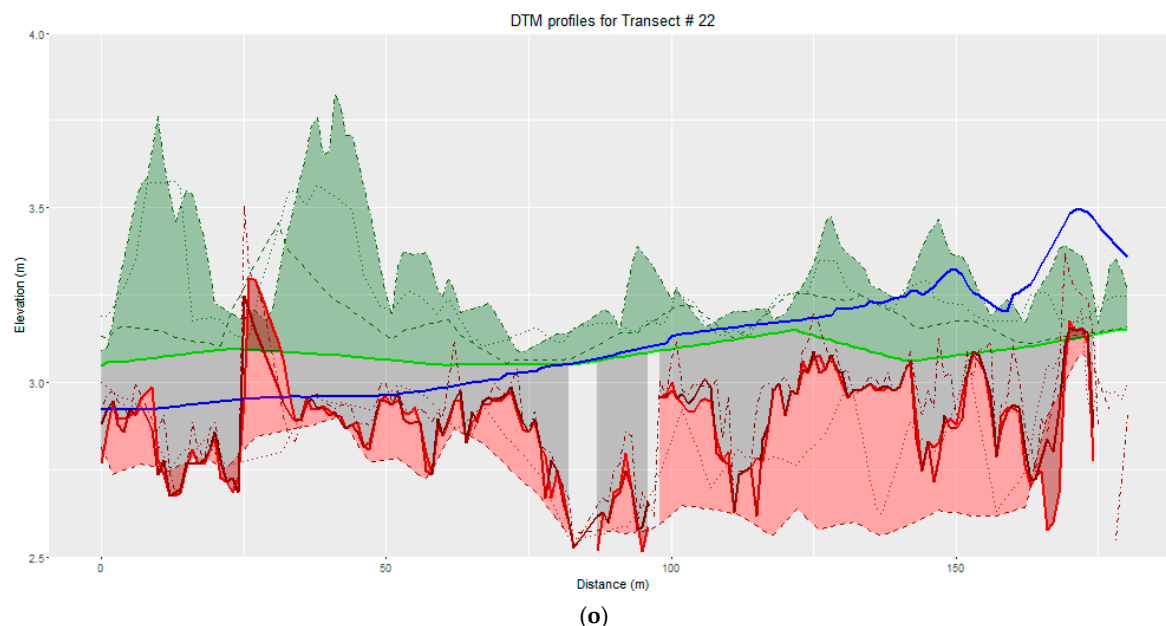

**Figures S1.** Vertical profile plots of  $DTM_{LIDAR}$ ,  $DTM_{UAV}$  and  $DTM_{IDW}$  for 15 different transects, as represented in Figure 11. (a–o) Calculated DoB (shaded grey area), along with vertical profile variability of pre-burn  $DTM_{LIDAR}$  and post-burn  $DTM_{UAV}$  profiles (shaded in green and red respectively). The profiles of the most suitable resolutions for measuring DoB and  $DTM_{IDW}$  are solid lines (pre-burn  $DTM_{LIDAR}$  at 20 m resolution is green, pre-burn  $DTM_{IDW}$  is blue, and post-burn  $DTM_{UAV}$  at 0.1 and 0.5 m resolutions are red and dark red). DTMs at 1, 5, and 10 m resolutions are represented by dot-dash, dotted, and dashed lines. These Figures illustrate the effect of resolution on DTM retrieval, depth of burn and also  $DTM_{IDW}$  accuracy.

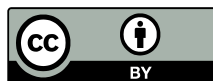

© 2016 by the authors; licensee MDPI, Basel, Switzerland. This article is an open access article distributed under the terms and conditions of the Creative Commons Attribution (CC-BY) license (<http://creativecommons.org/licenses/by/4.0/>).
